# Supplementary material for: Protective Effects against the Development of Alzheimer’s Disease in an Animal Model through Active Immunization with Methionine-Sulfoxide Rich Protein Antigen
Source: MDPI journal article supplement (doi:10.3390/antiox11040775), 2022-04-13
Supplement: s1 [file s1]

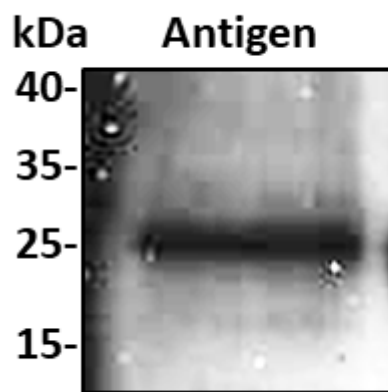

**Figure S1:** Western blot analysis showing detection of the antigen using the newly created rabbit anti-MetO antibody as the primary antibody (1:2000 dilution incubated for 1 h; kDa, Molecular mass markers shown in kilodaltons).
